# Supplementary material
Source: ML conference proceedings conference paper supplement (https://proceedings.neurips.cc/paper_files/paper/2019/hash/8cbd005a556ccd4211ce43f309bc0eac-Abstract.html)
Supplement: Supplementary file [file 8cbd005a556ccd4211ce43f309bc0eac-Supplemental.zip]

---

# Supplementary Material for “Curvilinear Distance Metric Learning”

---

## Abstract

This supplementary document contains all technical proofs for **Theorem 2**, **Theorem 3**, and **Theorem 4** in the NeurIPS 2019 paper entitled “Curvilinear Distance Metric Learning”. It is indeed the appendix section of the paper.

## A Proof of Theorem 2 (Fitting Capability)

We introduce the following Lemma 1 for proving our Theorem 2.

**Lemma 1.** Assume that  $s_1, s_2, \dots, s_K > 0$  and  $t_j = j + \kappa_s(j)\Delta$  for  $j = 1, 2, \dots, H$ , where  $H = \sum_{i=1}^K s_i$  and  $\kappa_s(j)$  denotes the maximal integer satisfying  $\sum_{i=1}^{\kappa_s(j)} s_i < j$ . Then for the Vandermonde matrix

$$\mathbf{V}_{t_1, t_2, \dots, t_H}(\Delta) = \begin{pmatrix} 1 & 0 & \dots & 0 \\ 1 & t_1 & \dots & t_1^H \\ \vdots & \vdots & \ddots & \vdots \\ 1 & t_H & \dots & t_H^H \end{pmatrix} \in \mathbb{R}^{(H+1) \times (H+1)}, \quad (\text{A.1})$$

the limitation of  $(\mathbf{V}_{t_1, t_2, \dots, t_H}(\Delta))^{-1}$  exists as  $\Delta \rightarrow +\infty$ .

*Proof.* As  $1 = t_1 < t_2 < \dots < t_H$ , it holds that

$$\det(\mathbf{V}_{t_1, t_2, \dots, t_H}(\Delta)) = \prod_{1 \leq i < j \leq H} (t_j - t_i) \neq 0, \quad (\text{A.2})$$

which implies that the matrix  $\mathbf{V}_{t_1, t_2, \dots, t_H}(\Delta)$  is invertible. Then we denote the *adjoint matrix* of  $\mathbf{V}_{t_1, t_2, \dots, t_H}(\Delta)$  as  $\mathbf{V}^* \in \mathbb{R}^{(H+1) \times (H+1)}$ , and we have

$$(\mathbf{V}_{t_1, t_2, \dots, t_H}(\Delta))^{-1} = \frac{\mathbf{V}^*}{\det(\mathbf{V}_{t_1, t_2, \dots, t_H}(\Delta))}, \quad (\text{A.3})$$

where  $V_{ij}^* = (-1)^{i+j} V(i, j)$  and  $V(i, j) \in \mathbb{R}$  is the cofactor of  $\mathbf{V}_{t_1, t_2, \dots, t_H}(\Delta)$  w.r.t.  $i$ -th row and  $j$ -column. According to the definition of determinant,  $\det(\mathbf{V}_{t_1, t_2, \dots, t_H}(\Delta))$  can be written as

$$\det(\mathbf{V}_{t_1, t_2, \dots, t_H}(\Delta)) = \sum_{k=0}^Q u_k \Delta^k, \quad (\text{A.4})$$

where the polynomial order  $Q \leq H$ , and the polynomial coefficients  $\mathbf{u} = (u_0, u_1, \dots, u_Q)^\top$ . For the cofactor  $V(i, j)$ , we have that

$$V(i, j) = \sum_{k=0}^{P(i, j)} v_k^{(i, j)} \Delta^k, \quad (\text{A.5})$$

and the polynomial order  $P(i, j) \leq Q$  can be directly obtained from the definition of the cofactor, in which the polynomial coefficients  $\mathbf{v}^{(i, j)} = (v_0^{(i, j)}, v_1^{(i, j)}, \dots, v_{P(i, j)}^{(i, j)})^\top$ . Then for Eq. (A.3), we have

$$\lim_{\Delta \rightarrow +\infty} \left| \frac{V_{ij}^*}{\det(\mathbf{V}_{t_1, t_2, \dots, t_H}(\Delta))} \right| = \lim_{\Delta \rightarrow +\infty} \frac{\left| \sum_{k=0}^{P(i, j)} v_k^{(i, j)} \Delta^k \right|}{\left| \sum_{k=0}^Q u_k \Delta^k \right|} = \lim_{\Delta \rightarrow +\infty} \left| \frac{v_{P(i, j)}^{(i, j)} \Delta^{P(i, j)}}{u_Q \Delta^Q} \right|, \quad (\text{A.6})$$

and

$$\lim_{\Delta \rightarrow +\infty} \left| \frac{v_{P^{(i,j)}}^{(i,j)} \Delta^{P^{(i,j)}}}{u_Q \Delta^Q} \right| = \begin{cases} 0, & \text{if } P^{(i,j)} < Q, \\ \left| \frac{v_{P^{(i,j)}}^{(i,j)}}{u_Q} \right|, & \text{if } P^{(i,j)} = Q. \end{cases} \quad (\text{A.7})$$

where  $i, j \in \mathbb{N}_{H+1}$ . Therefore, the limitation of  $(\mathbf{V}_{t_1, t_2, \dots, t_H}(\Delta))^{-1}$  exists as  $\Delta \rightarrow +\infty$ .  $\square$

**Theorem 2.** For given  $\Delta_{\text{margin}} > 0$ , there exist  $m, c \in \mathbb{N}$  and  $\widetilde{\mathcal{M}} \in \mathbb{R}^{m \times d \times c}$  such that

$$\text{Dist}_{\widetilde{\mathcal{M}}}(\beta, \widehat{\beta}) - \text{Dist}_{\widetilde{\mathcal{M}}}(\alpha, \widehat{\alpha}) > \Delta_{\text{margin}}, \quad (\text{A.8})$$

where  $(\alpha, \widehat{\alpha}) \in \mathcal{X}_{\text{Similar}}$  and  $(\beta, \widehat{\beta}) \in \mathcal{X}_{\text{Dissimilar}}$ .

*Proof.* We first convert the point pair sets  $\mathcal{X}_{\text{Similar}}$  and  $\mathcal{X}_{\text{Dissimilar}}$  to point sets  $A_1, A_2, \dots, A_K$  of  $K$  categories. Specifically, the pair sets can be written as

$$\begin{cases} \mathcal{X}_{\text{Similar}} &= \cup_{i=1}^K (A_i \times A_i), \\ \mathcal{X}_{\text{Dissimilar}} &= \cup_{i \neq j} (A_i \times A_j), \end{cases} \quad (\text{A.9})$$

where “ $\times$ ” denotes the *Cartesian Product* [2] of two sets. Assume that

$$\begin{cases} A_1 = \{\mathbf{a}_1^{(1)}, \mathbf{a}_1^{(2)}, \dots, \mathbf{a}_1^{(|A_1|)} \in \mathbb{R}^d\}, \\ A_2 = \{\mathbf{a}_2^{(1)}, \mathbf{a}_2^{(2)}, \dots, \mathbf{a}_2^{(|A_2|)} \in \mathbb{R}^d\}, \\ \dots, \\ A_K = \{\mathbf{a}_K^{(1)}, \mathbf{a}_K^{(2)}, \dots, \mathbf{a}_K^{(|A_K|)} \in \mathbb{R}^d\}. \end{cases} \quad (\text{A.10})$$

where  $|A_i|$  denotes the cardinality of the set  $A_i$  for  $i = 1, 2, \dots, K$ . Let  $t_j = j + \kappa(j)\Delta$  and<sup>1</sup>

$$(\mathbf{b}_1, \dots, \mathbf{b}_H) = (\mathbf{a}_1^{(1)}, \dots, \mathbf{a}_1^{(|A_1|)}, \mathbf{a}_2^{(1)}, \dots, \mathbf{a}_2^{(|A_2|)}, \dots, \mathbf{a}_K^{(1)}, \dots, \mathbf{a}_K^{(|A_K|)}), \quad (\text{A.11})$$

where  $\mathbf{b}_j \in \mathbb{R}^d$ ,  $j \in \mathbb{N}_H$ ,  $\Delta > 0$ ,  $H = \sum_{i=1}^K |A_i|$ . We further denote that  $t_0 = 0$ ,  $\mathbf{b}_0 = \mathbf{0} \in \mathbb{R}^d$  and construct the following *Vandermonde matrix*

$$\mathbf{V}_{t_1, t_2, \dots, t_H}(\Delta) = \begin{pmatrix} 1 & t_0 & \dots & t_0^H \\ 1 & t_1 & \dots & t_1^H \\ \vdots & \vdots & \ddots & \vdots \\ 1 & t_H & \dots & t_H^H \end{pmatrix} = \begin{pmatrix} 1 & 0 & \dots & 0 \\ 1 & t_1 & \dots & t_1^H \\ \vdots & \vdots & \ddots & \vdots \\ 1 & t_H & \dots & t_H^H \end{pmatrix} \in \mathbb{R}^{(H+1) \times (H+1)}. \quad (\text{A.12})$$

Then we have

$$\det(\mathbf{V}_{t_1, t_2, \dots, t_H}(\Delta)) = \prod_{1 \leq i < j \leq H} (t_j - t_i) \neq 0. \quad (\text{A.13})$$

Therefore, the equation group  $\mathbf{V}_{t_1, t_2, \dots, t_H}(\Delta) \boldsymbol{\mu}_k = (b_{0k}, b_{1k}, \dots, b_{Hk})^\top$  has the unique solution  $\boldsymbol{\mu}_k = (\mu_{k0}, \mu_{k1}, \dots, \mu_{kH})^\top$ , in which  $b_{jk}$  denotes the  $k$ -th element of the vector  $\mathbf{b}_j$  and  $k = 1, 2, \dots, d$ . It implies that the polynomial function  $f_{\boldsymbol{\mu}_k}(t) = \sum_{i=0}^H \mu_{ki} t^i$  crosses the points  $(t_0, b_{0k}), (t_1, b_{1k}), \dots, (t_H, b_{Hk})$  successively for  $k = 1, 2, \dots, d$ .

Without loss of generality, we assume that there exist real numbers  $\tilde{t}_1, \tilde{t}_2, \dots, \tilde{t}_S \notin \{t_0, t_1, \dots, t_H\}$  and function  $l(j)$  such that

$$(f_{\boldsymbol{\mu}_1}(\tilde{t}_j), f_{\boldsymbol{\mu}_2}(\tilde{t}_j), \dots, f_{\boldsymbol{\mu}_{d-1}}(\tilde{t}_j)) = (b_{l(j)1}, b_{l(j)2}, \dots, b_{l(j)(d-1)}), \quad (\text{A.14})$$

where  $j \in \mathbb{N}_S$ . Since the  $H$ -order polynomial equation exists  $H$  real roots at most, we can easily obtain  $S \leq H(H-1)$ . Then we assume that  $\{\tilde{t}_1, \tilde{t}_2, \dots, \tilde{t}_S\} = \{\tilde{t}_1^+, \tilde{t}_2^+, \dots, \tilde{t}_U^+\} \cup \{\tilde{t}_1^-, \tilde{t}_2^-, \dots, \tilde{t}_V^-\}$  which satisfies

$$\begin{cases} f_{\boldsymbol{\mu}_d}(\tilde{t}_j^+) = b_{l(j)d}, & \text{for } j = 1, 2, \dots, U, \\ f_{\boldsymbol{\mu}_d}(\tilde{t}_j^-) \neq b_{l(j)d}, & \text{for } j = 1, 2, \dots, V. \end{cases} \quad (\text{A.15})$$

<sup>1</sup>Here  $\kappa(j)$  denotes the maximal integer satisfying  $\sum_{i=1}^{\kappa(j)} |A_i| < j$ .

We construct the following function

$$\tilde{f}_{\mu_d}(t) = f_{\mu_d}(t) + \frac{1}{\prod_{i=0}^H(|t_i| + 1) \prod_{j=1}^V(|\tilde{t}_j^-| + 1)} \prod_{i=0}^H(t - t_i) \prod_{j=1}^V(t - \tilde{t}_j^-), \quad (\text{A.16})$$

which satisfies

$$\begin{cases} \tilde{f}_{\mu_d}(t) = f_{\mu_d}(t), & t \in \{t_0, t_1, \dots, t_H\} \cup \{\tilde{t}_1^-, \tilde{t}_2^-, \dots, \tilde{t}_V^-\}, \\ \tilde{f}_{\mu_d}(t) \neq f_{\mu_d}(t), & t \notin \{t_0, t_1, \dots, t_H\} \cup \{\tilde{t}_1^-, \tilde{t}_2^-, \dots, \tilde{t}_V^-\}. \end{cases} \quad (\text{A.17})$$

It is easy to verify that for any  $j \in \mathbb{N}_S$ , we have

$$\tilde{f}_{\mu_d}(\tilde{t}_j) \neq b_{l(j)d}. \quad (\text{A.18})$$

According to Eq. (A.14) and Eq. (A.18), it follows that for  $t \in \{\tilde{t}_1, \tilde{t}_2, \dots, \tilde{t}_S\}^2$

$$(f_{\mu_1}(t), f_{\mu_2}(t), \dots, f_{\mu_d}(t), \tilde{f}_{\mu_d}(t))^{\top} \notin \{\mathbf{b}_0, \mathbf{b}_1, \dots, \mathbf{b}_H\}. \quad (\text{A.19})$$

Furthermore, for  $t \in \mathbb{R} \setminus \{\tilde{t}_1, \tilde{t}_2, \dots, \tilde{t}_S, t_0, t_1, \dots, t_H\}$ , it holds that<sup>3</sup>

$$(f_{\mu_1}(t), f_{\mu_2}(t), \dots, f_{\mu_d}(t), \tilde{f}_{\mu_d}(t))^{\top} \notin \{\mathbf{b}_0, \mathbf{b}_1, \dots, \mathbf{b}_H\}. \quad (\text{A.20})$$

In summary, for any  $t \in \mathbb{R}$ , we have

$$\begin{cases} (f_{\mu_1}(t), f_{\mu_2}(t), \dots, f_{\mu_d}(t), \tilde{f}_{\mu_d}(t))^{\top} \in \{\mathbf{b}_0, \mathbf{b}_1, \dots, \mathbf{b}_H\}, & \text{if } t \in \{t_0, t_1, \dots, t_H\}, \\ (f_{\mu_1}(t), f_{\mu_2}(t), \dots, f_{\mu_d}(t), \tilde{f}_{\mu_d}(t))^{\top} \notin \{\mathbf{b}_0, \mathbf{b}_1, \dots, \mathbf{b}_H\}, & \text{if } t \notin \{t_0, t_1, \dots, t_H\}. \end{cases} \quad (\text{A.21})$$

Namely we have that  $(f_{\mu_1}(t), f_{\mu_2}(t), \dots, f_{\mu_d}(t), \tilde{f}_{\mu_d}(t))^{\top} \in \{\mathbf{b}_0, \mathbf{b}_1, \dots, \mathbf{b}_H\}$  if and only if  $t \in \{t_0, t_1, \dots, t_H\}$ . Let

$$\boldsymbol{\omega}(t) = (f_{\mu_1}(t), f_{\mu_2}(t), \dots, f_{\mu_d}(t), \tilde{f}_{\mu_d}(t))^{\top}, \quad (\text{A.22})$$

then we thus have that  $\boldsymbol{\omega}(t)$  is invertible at  $t = t_0, t_1, \dots, t_H$ , i.e.,  $t_i = \boldsymbol{\omega}^{-1}(\mathbf{b}_i)$  for  $i = 0, 1, \dots, H$ . We denote  $D^+$  and  $D^-$  as

$$\begin{cases} D^+ = \max_{(\boldsymbol{\alpha}, \hat{\boldsymbol{\alpha}}) \in \mathcal{X}_{\text{Similar}}} \text{Length}_{\boldsymbol{\omega}}(\boldsymbol{\alpha}, \hat{\boldsymbol{\alpha}}), \\ D^- = \min_{(\boldsymbol{\beta}, \hat{\boldsymbol{\beta}}) \in \mathcal{X}_{\text{Dissimilar}}} \text{Length}_{\boldsymbol{\omega}}(\boldsymbol{\beta}, \hat{\boldsymbol{\beta}}), \end{cases} \quad (\text{A.23})$$

then we have

$$D^+ = \max_{(\boldsymbol{\alpha}, \hat{\boldsymbol{\alpha}}) \in \mathcal{X}_{\text{Similar}}} \int_{\min(\mathcal{T}_{\boldsymbol{\omega}}(\boldsymbol{\alpha}), \mathcal{T}_{\boldsymbol{\omega}}(\hat{\boldsymbol{\alpha}}))}^{\max(\mathcal{T}_{\boldsymbol{\omega}}(\boldsymbol{\alpha}), \mathcal{T}_{\boldsymbol{\omega}}(\hat{\boldsymbol{\alpha}}))} \|\boldsymbol{\omega}'(t)\|_2 dt = \max_{(\boldsymbol{\alpha}, \hat{\boldsymbol{\alpha}}) \in \mathcal{X}_{\text{Similar}}} \int_{\min(\boldsymbol{\omega}^{-1}(\boldsymbol{\alpha}), \boldsymbol{\omega}^{-1}(\hat{\boldsymbol{\alpha}}))}^{\max(\boldsymbol{\omega}^{-1}(\boldsymbol{\alpha}), \boldsymbol{\omega}^{-1}(\hat{\boldsymbol{\alpha}}))} \|\boldsymbol{\omega}'(t)\|_2 dt, \quad (\text{A.24})$$

and

$$D^- = \min_{(\boldsymbol{\beta}, \hat{\boldsymbol{\beta}}) \in \mathcal{X}_{\text{Dissimilar}}} \int_{\min(\mathcal{T}_{\boldsymbol{\omega}}(\boldsymbol{\beta}), \mathcal{T}_{\boldsymbol{\omega}}(\hat{\boldsymbol{\beta}}))}^{\min(\mathcal{T}_{\boldsymbol{\omega}}(\boldsymbol{\beta}), \mathcal{T}_{\boldsymbol{\omega}}(\hat{\boldsymbol{\beta}}))} \|\boldsymbol{\omega}'(t)\|_2 dt = \min_{(\boldsymbol{\beta}, \hat{\boldsymbol{\beta}}) \in \mathcal{X}_{\text{Dissimilar}}} \int_{\min(\boldsymbol{\omega}^{-1}(\boldsymbol{\beta}), \boldsymbol{\omega}^{-1}(\hat{\boldsymbol{\beta}}))}^{\max(\boldsymbol{\omega}^{-1}(\boldsymbol{\beta}), \boldsymbol{\omega}^{-1}(\hat{\boldsymbol{\beta}}))} \|\boldsymbol{\omega}'(t)\|_2 dt. \quad (\text{A.25})$$

By Lemma 1, it follows that for  $k \in \mathbb{N}_d$

$$\lim_{\Delta \rightarrow +\infty} \boldsymbol{\mu}_k = (\mathbf{V}_{t_1, t_2, \dots, t_H}(\Delta))^{-1} (b_{0k}, b_{1k}, \dots, b_{Hk})^{\top} = \boldsymbol{\mu}_k^*. \quad (\text{A.26})$$

<sup>2</sup>Due to  $(f_{\mu_1}(\tilde{t}_j), f_{\mu_2}(\tilde{t}_j), \dots, f_{\mu_{d-1}}(\tilde{t}_j)) = (b_{l(j)1}, b_{l(j)2}, \dots, b_{l(j)(d-1)})$  and  $\tilde{f}_{\mu_d}(\tilde{t}_j) \neq b_{l(j)d}$ .

<sup>3</sup>There is no function  $l(j)$  satisfying  $(f_{\mu_1}(\tilde{t}_j), f_{\mu_2}(\tilde{t}_j), \dots, f_{\mu_{d-1}}(\tilde{t}_j)) = (b_{l(j)1}, b_{l(j)2}, \dots, b_{l(j)(d-1)})$ .

According to Eq. (A.22), it follows that the coefficients of the polynomial function  $g(t) = \|\omega'(t)\|_2^2$  converge as  $\Delta \rightarrow +\infty$ . Then we have

$$\begin{aligned}
& \lim_{\Delta \rightarrow +\infty} \frac{D^+}{D^-} \\
&= \lim_{\Delta \rightarrow +\infty} \frac{\max_{(\alpha, \hat{\alpha}) \in \mathcal{X}_{\text{Similar}}} \int_{\min(\omega^{-1}(\alpha), \omega^{-1}(\hat{\alpha}))}^{\max(\omega^{-1}(\alpha), \omega^{-1}(\hat{\alpha}))} \sqrt{g(t)} dt}{\min_{(\beta, \hat{\beta}) \in \mathcal{X}_{\text{Dissimilar}}} \int_{\min(\omega^{-1}(\beta), \omega^{-1}(\hat{\beta}))}^{\max(\omega^{-1}(\beta), \omega^{-1}(\hat{\beta}))} \sqrt{g(t)} dt} \\
&\leq \lim_{\Delta \rightarrow +\infty} \frac{\max_{(\alpha, \hat{\alpha}) \in \mathcal{X}_{\text{Similar}}} \int_{\min(\omega^{-1}(\alpha), \omega^{-1}(\hat{\alpha}))}^{\max(\omega^{-1}(\alpha), \omega^{-1}(\hat{\alpha}))} \sqrt{g(t)} dt}{\min_{(\beta, \hat{\beta}) \in \mathcal{X}_{\text{Dissimilar}}} \int_{\min(\omega^{-1}(\beta), \omega^{-1}(\hat{\beta})) + \frac{1}{2} |\omega^{-1}(\beta) - \omega^{-1}(\hat{\beta})|}^{\max(\omega^{-1}(\beta), \omega^{-1}(\hat{\beta}))} \sqrt{g(t)} dt} \\
&\leq \lim_{\Delta \rightarrow +\infty} \frac{\left( \max_{(\alpha, \hat{\alpha}) \in \mathcal{X}_{\text{Similar}}} |\omega^{-1}(\alpha) - \omega^{-1}(\hat{\alpha})| \right) \sqrt{g(t_H)}}{\left( \min_{(\beta, \hat{\beta}) \in \mathcal{X}_{\text{Dissimilar}}} \frac{1}{2} |\omega^{-1}(\beta) - \omega^{-1}(\hat{\beta})| \right) \sqrt{g\left(\frac{1}{2} |t_{|A_1|+1} - t_1\right)}}} \\
&\leq \lim_{\Delta \rightarrow +\infty} \frac{\left( \max_{k \in \mathbb{N}_K} |A_k| - 1 \right)}{\frac{1}{2} \Delta} \sqrt{\frac{g(t_H)}{g\left(\frac{1}{2} |t_{|A_1|+1} - t_1\right)}}} \\
&\leq \lim_{\Delta \rightarrow +\infty} \frac{2 \left( \max_{k \in \mathbb{N}_K} |A_k| - 1 \right)}{\Delta} \sqrt{\frac{g((K-1)\Delta + H)}{g\left(\frac{1}{2} \Delta + \frac{1}{2} |A_1|\right)}}} \\
&\leq \lim_{\Delta \rightarrow +\infty} \frac{2 \left( \max_{k \in \mathbb{N}_K} |A_k| - 1 \right) (2(K-1))^{\varphi/2}}{\Delta} = 0, \tag{A.27}
\end{aligned}$$

where  $\varphi$  is the order of the polynomial function  $g(t) = \|\omega'(t)\|_2^2$  and satisfies  $0 \leq \varphi \leq 2(H + S) \leq 2(H + H(H-1))$ . Further using the *non-negative* properties of  $D^+$  and  $D^-$ , it holds that  $\lim_{\Delta \rightarrow +\infty} D^+/D^- = 0$ . Therefore there exists the sufficiently large number  $\Delta > 0$  such that

$$0 \leq \frac{D^+}{D^-} \leq \frac{1}{2}. \tag{A.28}$$

Let  $m = \left\lceil \left( \frac{\Delta_{\text{margin}}}{D^+ \text{Length}_{\omega}(0, 1)} \right)^2 \right\rceil$  and  $\widetilde{\mathcal{M}}_{i::}(t) = \omega(t)$  for  $i = 1, 2, \dots, m$ , we obtain<sup>4</sup>

$$\begin{aligned}
& \text{Dist}_{\widetilde{\mathcal{M}}}(\beta, \hat{\beta}) - \text{Dist}_{\widetilde{\mathcal{M}}}(\alpha, \hat{\alpha}) \\
&= \sqrt{m \text{Length}_{\omega}^2(0, 1) \text{Length}_{\omega}^2(\beta, \hat{\beta})} - \sqrt{m \text{Length}_{\omega}^2(0, 1) \text{Length}_{\omega}^2(\alpha, \hat{\alpha})} \\
&\geq \sqrt{m} \text{Length}_{\omega}(0, 1) (D^- - D^+) \\
&\geq \sqrt{m} \text{Length}_{\omega}(0, 1) D^+ \\
&\geq \frac{\Delta_{\text{margin}}}{D^+ \text{Length}_{\omega}(0, 1)} \text{Length}_{\omega}(0, 1) D^+ \\
&= \Delta_{\text{margin}}, \tag{A.29}
\end{aligned}$$

which completes the proof.  $\square$

## B Proof of Theorem 3 (Generalization Bound)

We firstly introduce the following lemmas for proving our Theorem 3 .

<sup>4</sup>Here the operator  $\lceil a \rceil$  denotes the smallest integer that is not smaller than  $a$ .

**Lemma 2** (McDiarmid's Inequality [3]). *Consider independent random variables  $v_1, v_2, \dots, v_n \in \mathcal{V}$  and a function  $\phi : \mathcal{V}^n \rightarrow \mathbb{R}$ . Suppose that for all  $v_1, v_2, \dots, v_n$  and  $v'_i \in \mathcal{V}$  ( $i = 1, 2, \dots, n$ ), the function satisfies*

$$|\phi(v_1, \dots, v_{i-1}, v_i, v_{i+1}, \dots, v_n) - \phi(v_1, \dots, v_{i-1}, v'_i, v_{i+1}, \dots, v_n)| \leq c_i, \quad (\text{B.1})$$

and then it holds that

$$\mathcal{P}\{\phi(v_1, v_2, \dots, v_n) - \mathbb{E}_{v_1, v_2, \dots, v_n}(\phi(v_1, v_2, \dots, v_n)) > \mu\} \leq e^{-\frac{2\mu^2}{\sum_{i=1}^n c_i^2}}. \quad (\text{B.2})$$

**Lemma 3.** *Let  $\mathcal{M}^* \in \mathbb{R}^{m \times d \times c}$  be the solution to the optimization objective*

$$\mathcal{M}^* \in \arg \min_{\mathcal{M} \in \mathbb{R}^{m \times d \times c}} \frac{1}{N} \sum_{j=1}^N \mathcal{L}(\text{Dist}_{\mathcal{M}}^2(\mathbf{x}_j, \hat{\mathbf{x}}_j); y_j) + \lambda \|\mathcal{M}\|_F^2, \quad (\text{B.3})$$

then there exists a bounded tensor set  $\mathcal{F}(\lambda)$  such that

$$\mathcal{M}^* \in \mathcal{F}(\lambda) = \left\{ \mathcal{M} \mid \mathcal{M}_{ijk} \in \left[ -\sqrt{\frac{C_0}{\lambda}}, \sqrt{\frac{C_0}{\lambda}} \right], i \in \mathbb{N}_m, j \in \mathbb{N}_d, \text{ and } k \in \mathbb{N}_c \right\}, \quad (\text{B.4})$$

where the constant  $C_0 > 0$  is not dependent on  $\lambda$ .

*Proof.* According to the optimality of  $\mathcal{M}^*$ , it follows that

$$\begin{aligned} & \frac{1}{N} \sum_{j=1}^N \mathcal{L}(\text{Dist}_{\mathcal{M}^*}^2(\mathbf{x}_j, \hat{\mathbf{x}}_j); y_j) + \lambda \|\mathcal{M}^* - \mathbf{0}\|_F^2 \\ & \leq \frac{1}{N} \sum_{j=1}^N \mathcal{L}(\text{Dist}_{\mathbf{0}}^2(\mathbf{x}_j, \hat{\mathbf{x}}_j); y_j) + \lambda \|\mathbf{0} - \mathbf{0}\|_F^2 \\ & \leq \frac{1}{N} \sum_{j=1}^N \mathcal{L}(\text{Dist}_{\mathbf{0}}^2(\mathbf{x}_j, \hat{\mathbf{x}}_j); y_j). \end{aligned} \quad (\text{B.5})$$

We denote that  $\mathcal{L}_{\min} = \inf_{\mathcal{M}^* \in \mathbb{R}^{m \times d \times c}, j=1, 2, \dots, N} \mathcal{L}(\text{Dist}_{\mathcal{M}^*}^2(\mathbf{x}_j, \hat{\mathbf{x}}_j); y_j)$ , and have that

$$\begin{aligned} & \lambda \|\mathcal{M}^* - \mathbf{0}\|_F^2 \\ & \leq \frac{1}{N} \sum_{j=1}^N \mathcal{L}(\text{Dist}_{\mathbf{0}}^2(\mathbf{x}_j, \hat{\mathbf{x}}_j); y_j) - \frac{1}{N} \sum_{j=1}^N \mathcal{L}(\text{Dist}_{\mathcal{M}^*}^2(\mathbf{x}_j, \hat{\mathbf{x}}_j); y_j) \\ & \leq \frac{1}{N} \sum_{j=1}^N \mathcal{L}(\text{Dist}_{\mathbf{0}}^2(\mathbf{x}_j, \hat{\mathbf{x}}_j); y_j) - \frac{1}{N} \sum_{j=1}^N \mathcal{L}_{\min} \\ & = C_0, \end{aligned} \quad (\text{B.6})$$

where  $C_0 > 0$ . Finally, we have

$$(\mathcal{M}_{ijk})^2 \leq \frac{C_0}{\lambda}, \quad (\text{B.7})$$

which completes the proof.  $\square$

The proof of Theorem 3 is given as follows.

**Theorem 3.** *Assume that  $\mathcal{R}(\mathcal{M}) = \|\mathcal{M}\|_F^2 = \sum_{i,j,k} (\mathcal{M}_{ijk})^2$  and  $\mathcal{M}^* \in \mathbb{R}^{m \times d \times c}$  is the solution to CDML. Then, we have that for any  $0 < \delta < 1$  with probability  $1 - \delta$*

$$\varepsilon(\mathcal{M}^*) - \bar{\varepsilon}_{\mathcal{X}}(\mathcal{M}^*) \leq X^* \sqrt{2 \ln(1/\delta)/N} + B_\lambda R_N(\mathcal{L}), \quad (\text{B.8})$$

where  $B_\lambda \rightarrow 0$  as  $\lambda \rightarrow +\infty$ . Here  $R_N(\mathcal{L})$  is the Rademacher complexity<sup>5</sup> of the loss function  $\mathcal{L}$  related to the space  $\mathbb{R}^{m \times d \times c}$  for  $N$  training pairs, and  $X^* = \max_{k \in \mathbb{N}_N} |\mathcal{L}(\text{Dist}_{\mathcal{M}^*}^2(\mathbf{x}_k, \hat{\mathbf{x}}_k); y_k)|$ .

<sup>5</sup>The Rademacher complexity of the hypothesis  $f$  over the space  $\mathcal{F}$  is defined as  $R_N(f) = \mathbb{E}_{\mathcal{X}, \sigma} [\sup_{\mathcal{M} \in \mathcal{F}} \frac{1}{N} \sum_{j=1}^N \sigma_j f(\mathcal{M})]$ , where  $\mathcal{X} = \{(\mathbf{x}_j, \hat{\mathbf{x}}_j) \sim \mathcal{D} \mid j \in \mathbb{N}_N\}$ , and  $P\{\sigma_j = -1\} = P\{\sigma_j = 1\} = 0.5$  for  $j \in \mathbb{N}_N$ .

*Proof.* Firstly, we denote that

$$\bar{\varepsilon}_{\mathcal{X},k}(\mathcal{M}^*) = \bar{\varepsilon}_{\mathcal{X}}(\mathcal{M}^*) - \frac{1}{N}(\mathcal{L}(\text{Dist}_{\mathcal{M}}^2(\mathbf{x}_k, \hat{\mathbf{x}}_k); y_k) - \mathcal{L}(\text{Dist}_{\mathcal{M}}^2(\mathbf{x}, \hat{\mathbf{x}}); y(\mathbf{x}, \hat{\mathbf{x}}))), \quad (\text{B.9})$$

where  $(\mathbf{x}, \hat{\mathbf{x}}) \in \{(\mathbf{x}_j, \hat{\mathbf{x}}_j) | j \in \mathbb{N}_N\}$  and  $y(\mathbf{x}, \hat{\mathbf{x}}) \in \{0, 1\}$  is the similarity label for  $(\mathbf{x}, \hat{\mathbf{x}})$ . By Lemma 3, it follows that

$$\begin{aligned} & (\varepsilon(\mathcal{M}^*) - \bar{\varepsilon}_{\mathcal{X}}(\mathcal{M}^*)) - (\varepsilon(\mathcal{M}^*) - \bar{\varepsilon}_{\mathcal{X},k}(\mathcal{M}^*)) \\ & \leq |\bar{\varepsilon}(\mathcal{M}^*) - \bar{\varepsilon}_{\mathcal{X},k}(\mathcal{M}^*)| \\ & = \frac{1}{N} |\mathcal{L}(\text{Dist}_{\mathcal{M}^*}^2(\mathbf{x}_k, \hat{\mathbf{x}}_k); y_k) - \mathcal{L}(\text{Dist}_{\mathcal{M}^*}^2(\mathbf{x}, \hat{\mathbf{x}}); y(\mathbf{x}, \hat{\mathbf{x}}))| \\ & \leq \frac{1}{N} (|\mathcal{L}(\text{Dist}_{\mathcal{M}^*}^2(\mathbf{x}_k, \hat{\mathbf{x}}_k); y_k)| + |\mathcal{L}(\text{Dist}_{\mathcal{M}^*}^2(\mathbf{x}, \hat{\mathbf{x}}); y(\mathbf{x}, \hat{\mathbf{x}}))|) \\ & \leq \frac{2}{N} X^*, \end{aligned} \quad (\text{B.10})$$

where  $X^* = \max_{k \in \mathbb{N}_N} |\mathcal{L}(\text{Dist}_{\mathcal{M}^*}^2(\mathbf{x}_k, \hat{\mathbf{x}}_k); y_k)|$ . Then we apply Lemma 2 to the term  $\varepsilon(\mathcal{M}^*) - \bar{\varepsilon}_{\mathcal{X}}(\mathcal{M}^*)$  and have that with probability  $1 - \delta$  it holds that

$$\varepsilon(\mathcal{M}^*) - \bar{\varepsilon}_{\mathcal{X}}(\mathcal{M}^*) \leq \mathbb{E}_{\mathcal{X}} [\varepsilon(\mathcal{M}^*) - \bar{\varepsilon}_{\mathcal{X}}(\mathcal{M}^*)] + X^* \sqrt{2 \ln(1/\delta)/N}. \quad (\text{B.11})$$

Now we only need to estimate the first term of the right-hand side of the above inequality. Specifically, there holds

$$\mathbb{E}_{\mathcal{X}} [\varepsilon(\mathcal{M}^*) - \bar{\varepsilon}_{\mathcal{X}}(\mathcal{M}^*)] = \mathbb{E}_{\mathcal{X}} [\mathbb{E}_{\mathcal{Z}} (\bar{\varepsilon}_{\mathcal{Z}}(\mathcal{M}^*)) - \bar{\varepsilon}_{\mathcal{X}}(\mathcal{M}^*)] \leq \mathbb{E}_{\mathcal{X}, \mathcal{Z}} [\bar{\varepsilon}_{\mathcal{Z}}(\mathcal{M}^*) - \bar{\varepsilon}_{\mathcal{X}}(\mathcal{M}^*)], \quad (\text{B.12})$$

where  $\mathcal{Z} = \{(\mathbf{z}_1, \hat{\mathbf{z}}_1), (\mathbf{z}_2, \hat{\mathbf{z}}_2), \dots, (\mathbf{z}_N, \hat{\mathbf{z}}_N) | (\mathbf{z}_j, \hat{\mathbf{z}}_j) \sim \mathcal{D}, j \in \mathbb{N}_N\}$  are independent identically distributed (i.i.d.) samples which are independent of  $\mathcal{X} = \{(\mathbf{x}_1, \hat{\mathbf{x}}_1), (\mathbf{x}_2, \hat{\mathbf{x}}_2), \dots, (\mathbf{x}_N, \hat{\mathbf{x}}_N) | (\mathbf{x}_j, \hat{\mathbf{x}}_j) \sim \mathcal{D}, j \in \mathbb{N}_N\}$ . By Lemma 3, we know that there exists the bounded tensor set  $\mathcal{F}(\lambda)$  such that

$$\mathcal{M}^* \in \mathcal{F}(\lambda) = \left\{ \mathcal{M} | \mathcal{M}_{ijk} \in \left[ -\sqrt{\frac{C_0}{\lambda}}, \sqrt{\frac{C_0}{\lambda}} \right], i \in \mathbb{N}_m, j \in \mathbb{N}_d, \text{ and } k \in \mathbb{N}_c \right\}, \quad (\text{B.13})$$

where  $C_0 > 0$  is a constant. Let the function

$$B_\lambda = 2 \mathbb{E}_{\mathcal{X}, \mathcal{Z}} \left[ \sup_{\mathcal{M} \in \mathcal{F}(\lambda)} \bar{\varepsilon}_{\mathcal{Z}}(\mathcal{M}) - \bar{\varepsilon}_{\mathcal{X}}(\mathcal{M}) \right] / \mathbb{E}_{\mathcal{X}, \mathcal{Z}} \left[ \sup_{\mathcal{M} \in \mathbb{R}^{m \times d \times c}} \bar{\varepsilon}_{\mathcal{Z}}(\mathcal{M}) - \bar{\varepsilon}_{\mathcal{X}}(\mathcal{M}) \right]. \quad (\text{B.14})$$

By *Levi's Monotone Convergence Theorem* [1], we have

$$\begin{aligned} & \lim_{\lambda \rightarrow +\infty} \mathbb{E}_{\mathcal{X}, \mathcal{Z}} \left[ \sup_{\mathcal{M} \in \mathcal{F}(\lambda)} \bar{\varepsilon}_{\mathcal{Z}}(\mathcal{M}) - \bar{\varepsilon}_{\mathcal{X}}(\mathcal{M}) \right] \\ & = \mathbb{E}_{\mathcal{X}, \mathcal{Z}} \left[ \lim_{\lambda \rightarrow +\infty} \sup_{\mathcal{M} \in \mathcal{F}(\lambda)} \bar{\varepsilon}_{\mathcal{Z}}(\mathcal{M}) - \sup_{\mathcal{M} \in \mathcal{F}(\lambda)} \bar{\varepsilon}_{\mathcal{X}}(\mathcal{M}) \right] \\ & = \mathbb{E}_{\mathcal{X}, \mathcal{Z}} [\bar{\varepsilon}_{\mathcal{Z}}(\mathbf{0}) - \bar{\varepsilon}_{\mathcal{X}}(\mathbf{0})] \\ & = \mathbb{E}_{\mathcal{Z}} [\bar{\varepsilon}_{\mathcal{Z}}(\mathbf{0})] - \mathbb{E}_{\mathcal{X}} [\bar{\varepsilon}_{\mathcal{X}}(\mathbf{0})] \\ & = 0. \end{aligned} \quad (\text{B.15})$$

Therefore, we obtain  $\lim_{\lambda \rightarrow +\infty} B_\lambda = 0$ . By standard symmetrization techniques for i.i.d. Rademacher variables  $\sigma = (\sigma_1, \sigma_2, \dots, \sigma_N)^\top$ , it follows that

$$\begin{aligned}
& \mathbb{E}_{\mathcal{X}, \mathcal{Z}} [\bar{\varepsilon}_{\mathcal{Z}}(\mathcal{M}^*) - \bar{\varepsilon}_{\mathcal{X}}(\mathcal{M}^*)] \\
& \leq \mathbb{E}_{\mathcal{X}, \mathcal{Z}} \left[ \sup_{\mathcal{M} \in \mathcal{F}(\sqrt{C_0/\lambda}, 3\sqrt{C_0/\lambda})} \bar{\varepsilon}_{\mathcal{Z}}(\mathcal{M}) - \bar{\varepsilon}_{\mathcal{X}}(\mathcal{M}) \right] \\
& = \frac{B_\lambda}{2} \mathbb{E}_{\mathcal{X}, \mathcal{Z}} \left[ \sup_{\mathcal{M} \in \mathbb{R}^{m \times d \times c}} \bar{\varepsilon}_{\mathcal{Z}}(\mathcal{M}) - \bar{\varepsilon}_{\mathcal{X}}(\mathcal{M}) \right] \\
& = \frac{B_\lambda}{2N} \mathbb{E}_{\mathcal{X}, \mathcal{Z}, \sigma} \left[ \sup_{\mathcal{M}^* \in \mathbb{R}^{m \times d \times c}} \sum_{j=1}^N \sigma_j (\mathcal{L}(\text{Dist}_{\mathcal{M}}^2(\mathbf{x}_j, \hat{\mathbf{x}}_j)) - \mathcal{L}(\text{Dist}_{\mathcal{M}}^2(\mathbf{z}_j, \hat{\mathbf{z}}_j))) \right] \\
& = \frac{B_\lambda}{N} \mathbb{E}_{\mathcal{X}, \sigma} \left[ \sup_{\mathcal{M}^* \in \mathbb{R}^{m \times d \times c}} \sum_{j=1}^N \sigma_j \mathcal{L}(\text{Dist}_{\mathcal{M}}^2(\mathbf{x}_j, \hat{\mathbf{x}}_j)) \right] \\
& = B_\lambda R_N(\mathcal{L}), \tag{B.16}
\end{aligned}$$

where  $\sigma_i \in \{-1, 1\}$  for  $i = 1, 2, \dots, n$ , and  $R_N(\mathcal{L})$  is the Rademacher complexity of  $\mathcal{L}$ . Finally, combining the above inequality with Eq. (B.11) and Eq. (B.12) completes the proof.  $\square$

## C Proof of Theorem 4 (Topological Property)

We firstly introduce the following Lemma 4 for proving our Theorem 4.

**Lemma 4.** *If the function  $\text{Length}_{\theta_i}(\mathbf{x}, \hat{\mathbf{x}})$  satisfies triangle property for  $i \in \mathbb{N}_m$ , then the curvilinear distance  $\text{Dist}_{\Theta}(\mathbf{x}, \hat{\mathbf{x}})$  satisfies triangle property, where  $\Theta = (\theta_1, \theta_2, \dots, \theta_m)$ .*

*Proof.* For  $i \in \mathbb{N}_m$  and  $\alpha, \beta, \gamma \in \mathbb{R}^d$ , we assume that

$$\text{Length}_{\theta_i}(\alpha, \beta) \leq \text{Length}_{\theta_i}(\alpha, \gamma) + \text{Length}_{\theta_i}(\gamma, \beta), \tag{C.1}$$

and obtain that

$$\text{Length}_{\theta_i}^2(\alpha, \beta) \leq \text{Length}_{\theta_i}^2(\alpha, \gamma) + \text{Length}_{\theta_i}^2(\gamma, \beta) + 2\text{Length}_{\theta_i}(\alpha, \gamma)\text{Length}_{\theta_i}(\gamma, \beta), \tag{C.2}$$

Accordingly, we have

$$\begin{aligned}
& \text{Dist}_{\Theta}^2(\alpha, \beta) \\
& = \sum_{i=1}^m s_{\theta_i} \cdot \text{Length}_{\theta_i}^2(\alpha, \beta) \\
& \leq \sum_{i=1}^m s_{\theta_i} \cdot \text{Length}_{\theta_i}^2(\alpha, \gamma) + s_{\theta_i} \text{Length}_{\theta_i}^2(\gamma, \beta) + 2s_{\theta_i} \text{Length}_{\theta_i}(\alpha, \gamma)\text{Length}_{\theta_i}(\gamma, \beta) \\
& = \text{Dist}_{\Theta}^2(\alpha, \gamma) + \text{Dist}_{\Theta}^2(\gamma, \beta) + 2 \sum_{i=1}^m (\sqrt{s_{\theta_i}} \text{Length}_{\theta_i}(\alpha, \gamma)) (\sqrt{s_{\theta_i}} \text{Length}_{\theta_i}(\gamma, \beta)) \\
& \leq \text{Dist}_{\Theta}^2(\alpha, \gamma) + \text{Dist}_{\Theta}^2(\gamma, \beta) + 2 \sqrt{\sum_{i=1}^m s_{\theta_i} \text{Length}_{\theta_i}^2(\alpha, \gamma)} \sqrt{\sum_{i=1}^m s_{\theta_i} \text{Length}_{\theta_i}^2(\gamma, \beta)} \\
& = \text{Dist}_{\Theta}^2(\alpha, \gamma) + \text{Dist}_{\Theta}^2(\gamma, \beta) + 2\text{Dist}_{\Theta}(\alpha, \gamma)\text{Dist}_{\Theta}(\gamma, \beta) \\
& = (\text{Dist}_{\Theta}(\alpha, \gamma) + \text{Dist}_{\Theta}(\gamma, \beta))^2, \tag{C.3}
\end{aligned}$$

where the last “ $\leq$ ” is based on the *Cauchy Inequality* [2]. Therefore, we obtain  $\text{Dist}_{\Theta}(\alpha, \beta) \leq \text{Dist}_{\Theta}(\alpha, \gamma) + \text{Dist}_{\Theta}(\gamma, \beta)$ , which completes the proof.  $\square$

**Theorem 4.** *For any learned curvilinear distance  $\text{Dist}_{\Theta}(\mathbf{x}, \hat{\mathbf{x}})$  and its corresponding parameter  $\Theta$ , we denote  $\Theta'(\tau) = (\theta'_1(\tau_1), \theta'_2(\tau_2), \dots, \theta'_m(\tau_m)) \in \mathbb{R}^{d \times m}$  and have that*

1).  $\text{Dist}_{\Theta}(\mathbf{x}, \hat{\mathbf{x}})$  is a **pseudo-metric** for any  $\Theta \in \mathbb{F}_m$ ;

2).  $\text{Dist}_{\Theta}(\mathbf{x}, \hat{\mathbf{x}})$  is a **metric**, if  $\Theta'(\tau)$  is full row rank for any  $\tau = (\tau_1, \tau_2, \dots, \tau_m)^\top \in \mathbb{R}^m$ .

*Proof.*

1). According to the definition of curvilinear distance, it is obvious that  $\text{Dist}_{\Theta}(x, \hat{x})$  satisfies the non-negativity. The symmetry property can also be validated, because switching  $x$  and  $\hat{x}$  will not change the lower and upper limit of the integral, *i.e.*,

$$\text{Dist}_{\Theta}(x, \hat{x}) = \sqrt{\sum_{i=1}^m s_{\theta_i} \cdot \left( \int_{\min(\mathcal{T}_{\theta_i}(x), \mathcal{T}_{\theta_i}(\hat{x}))}^{\max(\mathcal{T}_{\theta_i}(x), \mathcal{T}_{\theta_i}(\hat{x}))} \|\theta'_i(t)\|_2 dt \right)^2} = \text{Dist}_{\Theta}(\hat{x}, x). \quad (\text{C.4})$$

By invoking Lemma 4, we only need to demonstrate the triangle property of  $\text{Length}_{\theta_i}(x, \hat{x})$ . Actually, for any  $\alpha, \beta, \gamma \in \mathbb{R}^d$ , there exist the following 3 cases and their corresponding results.

(case-1).  $\mathcal{T}_{\theta_i}(\gamma) \leq \min\{\mathcal{T}_{\theta_i}(\alpha), \mathcal{T}_{\theta_i}(\beta)\}$ :

$$\begin{aligned} & \text{Length}_{\theta_i}(\alpha, \gamma) + \text{Length}_{\theta_i}(\gamma, \beta) \\ &= \int_{\min(\mathcal{T}_{\theta_i}(\alpha), \mathcal{T}_{\theta_i}(\gamma))}^{\max(\mathcal{T}_{\theta_i}(\alpha), \mathcal{T}_{\theta_i}(\gamma))} \|\theta'_i(t)\|_2 dt + \int_{\min(\mathcal{T}_{\theta_i}(\gamma), \mathcal{T}_{\theta_i}(\beta))}^{\max(\mathcal{T}_{\theta_i}(\gamma), \mathcal{T}_{\theta_i}(\beta))} \|\theta'_i(t)\|_2 dt \\ &\geq \int_{\mathcal{T}_{\theta_i}(\gamma)}^{\mathcal{T}_{\theta_i}(\alpha)} \|\theta'_i(t)\|_2 dt + \int_{\mathcal{T}_{\theta_i}(\gamma)}^{\mathcal{T}_{\theta_i}(\beta)} \|\theta'_i(t)\|_2 dt \\ &\geq \int_{\min(\mathcal{T}_{\theta_i}(\alpha), \mathcal{T}_{\theta_i}(\beta))}^{\max(\mathcal{T}_{\theta_i}(\alpha), \mathcal{T}_{\theta_i}(\beta))} \|\theta'_i(t)\|_2 dt \\ &= \text{Length}_{\theta_i}(\alpha, \beta). \end{aligned} \quad (\text{C.5})$$

(case-2).  $\min\{\mathcal{T}_{\theta_i}(\alpha), \mathcal{T}_{\theta_i}(\beta)\} < \mathcal{T}_{\theta_i}(\gamma) < \max\{\mathcal{T}_{\theta_i}(\alpha), \mathcal{T}_{\theta_i}(\beta)\}$ :

$$\begin{aligned} & \text{Length}_{\theta_i}(\alpha, \gamma) + \text{Length}_{\theta_i}(\gamma, \beta) \\ &= \int_{\min(\mathcal{T}_{\theta_i}(\alpha), \mathcal{T}_{\theta_i}(\gamma))}^{\max(\mathcal{T}_{\theta_i}(\alpha), \mathcal{T}_{\theta_i}(\gamma))} \|\theta'_i(t)\|_2 dt + \int_{\min(\mathcal{T}_{\theta_i}(\gamma), \mathcal{T}_{\theta_i}(\beta))}^{\max(\mathcal{T}_{\theta_i}(\gamma), \mathcal{T}_{\theta_i}(\beta))} \|\theta'_i(t)\|_2 dt \\ &= \int_{\min(\mathcal{T}_{\theta_i}(\alpha), \mathcal{T}_{\theta_i}(\beta))}^{\mathcal{T}_{\theta_i}(\gamma)} \|\theta'_i(t)\|_2 dt + \int_{\mathcal{T}_{\theta_i}(\gamma)}^{\max(\mathcal{T}_{\theta_i}(\alpha), \mathcal{T}_{\theta_i}(\beta))} \|\theta'_i(t)\|_2 dt \\ &= \text{Length}_{\theta_i}(\alpha, \beta). \end{aligned} \quad (\text{C.6})$$

(case-3).  $\mathcal{T}_{\theta_i}(\gamma) \geq \max\{\mathcal{T}_{\theta_i}(\alpha), \mathcal{T}_{\theta_i}(\beta)\}$ :

$$\begin{aligned} & \text{Length}_{\theta_i}(\alpha, \gamma) + \text{Length}_{\theta_i}(\gamma, \beta) \\ &= \int_{\min(\mathcal{T}_{\theta_i}(\alpha), \mathcal{T}_{\theta_i}(\gamma))}^{\max(\mathcal{T}_{\theta_i}(\alpha), \mathcal{T}_{\theta_i}(\gamma))} \|\theta'_i(t)\|_2 dt + \int_{\min(\mathcal{T}_{\theta_i}(\gamma), \mathcal{T}_{\theta_i}(\beta))}^{\max(\mathcal{T}_{\theta_i}(\gamma), \mathcal{T}_{\theta_i}(\beta))} \|\theta'_i(t)\|_2 dt \\ &\geq \int_{\mathcal{T}_{\theta_i}(\alpha)}^{\mathcal{T}_{\theta_i}(\gamma)} \|\theta'_i(t)\|_2 dt + \int_{\mathcal{T}_{\theta_i}(\beta)}^{\mathcal{T}_{\theta_i}(\gamma)} \|\theta'_i(t)\|_2 dt \\ &\geq \int_{\min(\mathcal{T}_{\theta_i}(\alpha), \mathcal{T}_{\theta_i}(\beta))}^{\max(\mathcal{T}_{\theta_i}(\alpha), \mathcal{T}_{\theta_i}(\beta))} \|\theta'_i(t)\|_2 dt \\ &= \text{Length}_{\theta_i}(\alpha, \beta). \end{aligned} \quad (\text{C.7})$$

From the results of above 3 cases, we know that the triangle property is satisfied for any  $\Theta \in \mathbb{F}_m$  and thus the proof is completed.

2). It is obvious that for any  $x, \hat{x} \in \mathbb{R}^d$ ,

$$x = \hat{x} \implies \text{Dist}_{\Theta}(x, \hat{x}) = 0. \quad (\text{C.8})$$

We just need to prove that  $x = \hat{x}$  for  $\text{Dist}_{\Theta}(x, \hat{x}) = 0$ . Assume that  $\text{Rank}(\Theta'(\tau)) = d$ , we obtain  $\theta'_i(\frac{1}{2}) \neq 0$ . The scale value  $\text{Length}_{\theta_i}(0, 1)$  satisfies

$$\text{Length}_{\theta_i}(0, 1) = \int_0^1 \|\theta'_i(t)\|_2 dt \geq \int_{\frac{1}{2}-\epsilon}^{\frac{1}{2}+\epsilon} \|\theta'_i(t)\|_2 dt > 0, \quad (\text{C.9})$$

where  $0 < \epsilon < \frac{1}{2}$  is a sufficiently small number such that  $\theta'_i(t) \neq 0$  for  $t \in (\frac{1}{2} - \epsilon, \frac{1}{2} + \epsilon)$ . We thus have

$$\text{Dist}_{\Theta}(x, \hat{x}) = 0 \implies \text{Length}_{\theta_i}(0, 1)\text{Length}_{\theta_i}(x, \hat{x}) = 0 \implies \text{Length}_{\theta_i}(x, \hat{x}) = 0, \quad (\text{C.10})$$



where  $i \in \mathbb{N}_m$ . Therefore, we have  $\mathcal{T}_{\theta_i}(\mathbf{x}) = \mathcal{T}_{\theta_i}(\hat{\mathbf{x}})$ . According to the definition of the calibration point, it follows that

$$\mathcal{T}_{\theta_i}(\mathbf{x}) \in \arg \min_{t \in \mathbb{R}} \|\theta_i(t) - \mathbf{x}\|_2^2, \quad (\text{C.11})$$

and

$$\mathcal{T}_{\theta_i}(\hat{\mathbf{x}}) \in \arg \min_{t \in \mathbb{R}} \|\theta_i(t) - \hat{\mathbf{x}}\|_2^2. \quad (\text{C.12})$$

Namely, it holds that

$$\mathcal{T}_{\theta_i}(\mathbf{x}) \in \{t \mid (\theta_i(t) - \mathbf{x})^\top \theta'_i(t) = 0\}, \quad (\text{C.13})$$

and

$$\mathcal{T}_{\theta_i}(\hat{\mathbf{x}}) \in \{t \mid (\theta_i(t) - \hat{\mathbf{x}})^\top \theta'_i(t) = 0\}. \quad (\text{C.14})$$

Since  $\mathcal{T}_{\theta_i}(\mathbf{x}) = \mathcal{T}_{\theta_i}(\hat{\mathbf{x}}) = \tau_i$ , we have the following equation group

$$\begin{cases} (\theta_i(\tau_i) - \mathbf{x})^\top \theta'_i(\tau_i) = 0, \\ (\theta_i(\tau_i) - \hat{\mathbf{x}})^\top \theta'_i(\tau_i) = 0. \end{cases} \quad (\text{C.15})$$

The equation difference of Eq. (C.15) gives that

$$\theta'_i(\tau_i)^\top (\mathbf{x} - \hat{\mathbf{x}}) = 0. \quad (\text{C.16})$$

For  $i \in \mathbb{N}_m$ , we thus have the linear equation group w.r.t.  $\mathbf{x} - \hat{\mathbf{x}}$

$$(\theta'_1(\tau_1), \theta'_2(\tau_2), \dots, \theta'_m(\tau_m))^\top (\mathbf{x} - \hat{\mathbf{x}}) = \mathbf{0}. \quad (\text{C.17})$$

As  $\text{Rank}(\boldsymbol{\Theta}'(\boldsymbol{\tau})) = \text{Rank}(\theta'_1(\tau_1), \theta'_2(\tau_2), \dots, \theta'_m(\tau_m)) = d$ , we know that the above Eq. (C.17) has the unique solution  $\mathbf{x} - \hat{\mathbf{x}} = \mathbf{0}$ . Therefore,  $\mathbf{x} = \hat{\mathbf{x}}$  holds for  $\text{Dist}_{\boldsymbol{\Theta}}(\mathbf{x}, \hat{\mathbf{x}}) = 0$ , which completes the proof.  $\square$

## References

- [1] Steven G Krantz and Harold R Parks. *A primer of real analytic functions*. Springer Science & Business Media, 2002. B
- [2] Carl D Meyer. *Matrix analysis and applied linear algebra*, volume 71. Siam, 2000. A, C
- [3] Roman Vershynin. *High-dimensional probability: An introduction with applications in data science*, volume 47. Cambridge University Press, 2018. 2
